# Supplementary material
Source: Elsevier journal article supplement (https://www.sciencedirect.com/science/article/pii/S0014256521000527)
Supplement: mmc1 [file S0014256521000527:mmc1.pdf]

**Tabla suplementaria 1.** Grupos de trabajo iniciales para el desarrollo de la ECOE-CCS.

|                                     | <b>Reunión 25 de marzo 2020</b>                                       | <b>Reunión 25 de abril 2020</b>                                                                   | <b>Ejecución /Mes de la prueba</b> |
|-------------------------------------|-----------------------------------------------------------------------|---------------------------------------------------------------------------------------------------|------------------------------------|
| <b>Grupo de trabajo</b>             | <b>Coordinador del grupo</b>                                          |                                                                                                   |                                    |
| Fundación Practicum-Script®         | Prof. D. Emilio Cervera<br>(Universidad Francisco Vitoria)            | ECOE. Virtual con Practicum-Script®                                                               | Junio<br>5 FM                      |
| PowerPoint                          | Prof. D. Agustín Martínez<br>(Universidad País Vasco)                 | ECOE Virtual con casos compartidos para realizar en las plataformas virtuales de cada universidad | Junio<br>16 FM                     |
| Script                              | Prof. Dña. Lourdes Lledó<br>(Universidad de Alcalá de Henares)        |                                                                                                   |                                    |
| Videos                              | Prof. Dña. Consuelo Sánchez<br>(Universidad de Salamanca)             |                                                                                                   |                                    |
| Casos clínicos con paciente virtual | Prof. D. José Manuel Ramos Rincón (Universidad Miguel Hernández)      |                                                                                                   |                                    |
| Simulación basada en pantalla       | Prof. D. Manuel José Párraga Ramírez (Universidad Católica de Murcia) |                                                                                                   |                                    |

**Abreviaturas:** ECOE: Examen de competencias clínica y estructurado; FM: Facultad de Medicina.

## **Encuesta de satisfacción de alumnado CCS-ECOE**

### **Introducción**

Los estudiantes de sexto curso del Grado en Medicina realizan la Prueba Evaluación Clínica objetiva y estructurada (ECOE) al finalizar el Grado y que les da Título de Máster. Con motivo de la situación generada por la COVID-19, se ha diseñado una prueba de casos-clínicos computarizados simulados (CCS-ECOE) virtual y online en diferentes plataformas.

Con esta encuesta queremos conocer la satisfacción de los estudiantes con la CCS-ECOE.

### **Formulario**

Fecha (desplegable 6 junio o 20 junio)

Edad

Sexo

Universidad

### **Parte I. Valoración general**

**¿Cual fue el grado de satisfacción de la prueba simulacro de la CCS-ECOE realizada con anterioridad?**

(1 nada satisfecho, 2 poco satisfecho, 3 satisfecho, 4 muy satisfecho, 5 extremadamente satisfecho)

**¿Como valora la información previa al CCS-ECOE?**

(1 nula, 2 insuficiente, 3 adecuada, 4 buena, 5 excelente)

**¿Cree que se ha explicado de forma correcta qué es esta CCS-ECOE y lo que tenía que hacer en ella?**

(1 muy poco, 2 poco, 3 adecuado, 4 bien, 5 excelente)

**¿Entiende que la preparación recibida (adquisición de competencias) durante el grado le ha permitido afrontar con garantías esta CCS-ECOE?**

(1 muy poco, 2 poco, 3 adecuado, 4 bien, 5 excelente)

**Indica tu nivel de satisfacción con el espacio *online* de la realización de la CCS-ECOE.**

(1 nada satisfecho, 2 poco satisfecho, 3 satisfecho, 4 muy satisfecho, 5 extremadamente satisfecho)

**¿Cuál fue su nivel de estrés antes de comenzar la prueba?**

(1 totalmente tranquilo - 5 máximo nivel de estrés)

**¿Qué sentimientos te producía la CCS-ECOE antes de realizarla?**

Ansiedad y/o nerviosismo

Temor

Curiosidad

Indiferencia

Otros:

**Valore la organización del día de la prueba CCS-ECOE.**

(1 muy mala, 2 mala, 3 normal, 4 buena, 5 excelente)

**Valore la plataforma para de ejecución de la prueba CCS-ECOE.**

(1 muy mala, 2 mala, 3 normal, 4 buena, 5 excelente)

**Valores sus conocimientos previos durante la carrera para realizar la CCS-ECOE.**

(1 muy bajos, 2 bajos, 3 normales, 4 altos, 5 muy altos)

**¿Has tenido algún problema con la conexión a internet durante la prueba? SÍ / NO**

En caso afirmativo, describe el problema. \_\_\_\_\_

**¿Ha tenido videoconferencia simultanea con la prueba, para asegurar la identidad y dar apoyo en el chat?**

Sí

No

**En caso afirmativo, ¿le parece adecuado el sistema de videoconferencia simultánea con la prueba para asegurar la identidad y dar apoyo en el chat?**

(1 inadecuado, 2 poco adecuado, 3 adecuado, 4 muy adecuado, 5 extremadamente adecuado)

## **Parte II. Valoración del modelo de estación que tenga en la plataforma de la universidad**

**Valore lo que le han parecido las imágenes incluidas en ciertas estaciones.**

(1 muy malos, 2 malo, 3 normales, 4 buenos, 5 muy buenos)

**Valore lo que le han parecido las imágenes interactivas incluidas en ciertas estaciones de la plataforma Sakai.**

(1 muy malos, 2 malo, 3 normales, 4 buenos, 5 muy buenos)

**Valore lo que le han parecido los videos incluidos en ciertas estaciones.**

(1 muy malos, 2 malo, 3 normales, 4 buenos, 5 muy buenos)

**Valore lo que le han parecido las preguntas de múltiples opciones con una verdadera.**

(1 muy malos, 2 malo, 3 normales, 4 buenos, 5 muy buenos)

**Valore lo que le han parecido las preguntas de múltiples opciones con varias verdaderas (multi-respuesta).**

(1 muy malos, 2 malo, 3 normales, 4 buenos, 5 muy buenos)

**Valore lo que le han parecido las preguntas de múltiples opciones con varias opciones verdaderas (multi-respuesta) con retroalimentación.**

(1 muy malos, 2 malo, 3 normales, 4 buenos, 5 muy buenos)

**Valore lo que le han parecido las preguntas de arrastrar y soltar.**

(1 muy malos, 2 malo, 3 normales, 4 buenos, 5 muy buenos)

### **Parte III. Valoración de las estaciones**

**Valore la estación de lumbalgia, según la sencillez o la complicación en la ejecución de la misma.**

(1 muy sencilla, 2 sencilla, 3 adecuada, 4 difícil, 5 muy difícil)

**Valore el tiempo de 12 minutos de la estación de lumbalgia.**

(1 totalmente insuficiente, 2 insuficiente, 3 adecuado, pero justo, 4 suficiente, 5 más que suficiente)

**Valore la estación de agresión y parte de lesiones, según la sencillez o la complicación en la ejecución de la misma.**

(1 muy sencilla, 2 sencilla, 3 adecuada, 4 difícil, 5 muy difícil)

**Valore el tiempo de 12 minutos de la estación de agresión y parte de lesiones.**

(1 totalmente insuficiente, 2 insuficiente, 3 adecuado, pero justo, 4 suficiente, 5 más que suficiente)

**Valore la estación de prurito vaginal, según la sencillez o la complicación en la ejecución de la misma.**

(1 muy sencilla, 2 sencilla, 3 adecuada, 4 difícil, 5 muy difícil)

**Valore el tiempo de 12 minutos de la estación de prurito vaginal.**

(1 totalmente insuficiente, 2 insuficiente, 3 adecuado, pero justo, 4 suficiente, 5 más que suficiente)

**Valore la estación de derecho a la información, según la sencillez o la complicación en la ejecución de la misma.**

(1 muy sencilla, 2 sencilla, 3 adecuada, 4 difícil, 5 muy difícil)

**Valore el tiempo de 12 minutos de la estación de derecho a la información.**

(1 totalmente insuficiente, 2 insuficiente, 3 adecuado, pero justo, 4 suficiente, 5 más que suficiente)

**Valore la estación de parálisis facial según la sencillez o la complicación en la ejecución de la misma.**

(1 muy sencilla, 2 sencilla, 3 adecuada, 4 difícil, 5 muy difícil)

**Valore el tiempo de 12 minutos de la estación de parálisis facial.**

(1 totalmente insuficiente, 2 insuficiente, 3 adecuado, pero justo, 4 suficiente, 5 más que suficiente)

**Valore la estación de politraumatismo según la sencillez o la complicación en la ejecución de la misma.**

(1 muy sencilla, 2 sencilla, 3 adecuada, 4 difícil, 5 muy difícil)

**Valore el tiempo de 12 minutos de la estación de politraumatismo.**

(1 totalmente insuficiente, 2 insuficiente, 3 adecuado, pero justo, 4 suficiente, 5 más que suficiente)

**Valore la estación de entrevista psiquiátrica según la sencillez o la complicación en la ejecución de la misma.**

(1 muy sencilla, 2 sencilla, 3 adecuada, 4 difícil, 5 muy difícil)

**Valore el tiempo de 12 minutos de la estación de consulta psiquiátrica.**

(1 totalmente insuficiente, 2 insuficiente, 3 adecuado, pero justo, 4 suficiente, 5 más que suficiente)

**Valore la estación de proceso respiratorio según la sencillez o la complicación en la ejecución de la misma.**

(1 muy sencilla, 2 sencilla, 3 adecuada, 4 difícil, 5 muy difícil)

**Valore el tiempo de 12 minutos de la estación de proceso respiratorio.**

(1 totalmente insuficiente, 2 insuficiente, 3 adecuado, pero justo, 4 suficiente, 5 más que suficiente)

**Valore la estación de distensión abdominal según la sencillez o la complicación en la ejecución de la misma.**

(1 muy sencilla, 2 sencilla, 3 adecuada, 4 difícil, 5 muy difícil)

**Valore el tiempo de 12 minutos de la estación de proceso respiratorio.**

(1 totalmente insuficiente, 2 insuficiente, 3 adecuado, pero justo, 4 suficiente, 5 más que suficiente)

**Valore la estación de tacto rectal según la sencillez o la complicación en la ejecución de la misma.**

(1 muy sencilla, 2 sencilla, 3 adecuada, 4 difícil, 5 muy difícil)

**Valore el tiempo de 12 minutos de la estación de tacto rectal.**

(1 totalmente insuficiente, 2 insuficiente, 3 adecuado, pero justo, 4 suficiente, 5 más que suficiente)

**¿Qué estación te pareció más difícil? (Señale una)**

Estación de lumbalgia

Estación de agresión y parte de lesiones

Estación de prurito vaginal

Estación de derecho a la información

Estación de parálisis facial

Estación de politraumatismo

Estación de entrevista psiquiátrica  
Estación de proceso respiratorio  
Estación de distensión abdominal  
Estación de tacto rectal

**¿Qué estación te pareció más sencilla?**

Estación de lumbalgia  
Estación de agresión y parte de lesiones  
Estación de prurito vaginal  
Estación de derecho a la información  
Estación de parálisis facial  
Estación de politraumatismo  
Estación de entrevista psiquiátrica  
Estación de proceso respiratorio  
Estación de distensión abdominal  
Estación de tacto rectal

**Parte IV. Valoración global**

**Marque qué competencias clínicas han sido evaluadas con la CCS-ECOE. (Señale las que considere)**

Anamnesis  
Exploración clínica  
Comunicación  
Habilidades y procedimiento  
Juicio clínico y diagnóstico  
Actividades preventivas  
Profesionalismo y ética

**¿De las competencias que se presentan establezca de 0 a 100 el porcentaje que cree han sido evaluadas en esta prueba?**

Anamnesis  
Exploración clínica  
Comunicación  
Habilidades y procedimiento  
Juicio clínico y diagnóstico  
Actividades preventivas  
Profesionalismo y ética

**Este tipo de prueba (CCS-ECOE) es útil para medir las competencias**

Anamnesis (sí/no)  
Exploración clínica (sí/no)  
Comunicación (sí/no)  
Habilidades y procedimiento (sí/no)  
Juicio clínico y diagnóstico (sí/no)  
Actividades preventivas (sí/no)  
Profesionalismo y ética (sí/no)

**¿Se ha tenido que preparar por su cuenta alguna de las competencias evaluadas en la CCS-ECOE?**

Sí

No

**¿Esta prueba ha evaluado las competencias adquiridas en: (que puedan señalar todas)**

1) Todo el grado

2) Asignaturas clínicas

3) El rotatorio

**¿Piensa que las calificaciones que se obtengan en esta CCS-ECOE son justas considerando las posibilidades de copia este tipo de pruebas?**

(1. Injustas (por copia), 2 poco justas, 3 justas, 4 muy justas, 5 extremadamente justas)

**¿Cómo te pareció en términos de dificultad la CCS-ECOE?**

(1 muy fácil, 2 fácil, 3 indiferente 4. difícil, 5 muy difícil)

**¿Qué te han parecido el tipo de problemas médicos presentados con respecto a los contenidos vistos durante el grado?**

(1 no adecuados, 2 poco adecuados, 3 adecuados, 4 muy adecuado, 5 extremadamente adecuados)

**Obviando que esta CCS-ECOE es un examen, y como tal es evaluado, ¿qué te parecería como experiencia de aprendizaje?**

(1 pésima, 2 mala, 3 indiferente, 4 buena, 5 excelente)

**¿Cómo estimas que te fue en la CCS-ECOE?**

(1 mal, 2 regular, 3 bien, 4 muy bien, 5 excelente)

**Valore su experiencia de la CCS-ECOE.**

(1 muy mala, 2 mala, 3 normal, 4 buena, 5 muy buena)

**¿Qué puntuación (en una escala 1-10) esperas obtener tras analizar la CCS-ECOE?**

**¿En una línea responda que le ha aportado el examen?**

Nada.

Seguridad que lo que he aprendido en la carrera es útil.

Solamente estrés.

Estar en igualdad de condiciones con compañeros de otras facultades.

Una bonita experiencia.

**¿Quiere dejar algún comentario más amplio y abierto sobre CCS-ECOE?**

(Aquí nos puedes mencionar cualquier comentario que no hayas podido expresar previamente)
